# Supplementary material for: A Helminth-Derived Chitinase Structurally Similar to Mammalian Chitinase Displays Immunomodulatory Properties in Inflammatory Lung Disease
Source: J Immunol Res. 2021 Nov 25;2021:6234836. doi: 10.1155/2021/6234836 (PMC8639245; doi:10.1155/2021/6234836)
Supplement: Supplementary Materials — Table S1: mass spectrometric identification of T. suis larval ES proteins. Precipitated proteins were reduced, alkylated, tryptic digested, and analyzed by LC-MSMS and Mascot searches against the NCBI database. Significant hits (+) were identified with >2 peptides (p < 0.01); nonsignificant candidates (c) are also listed. Homologous proteins are grouped to the same number. S2: comparison of topology and secondary structure elements of T. suis chitinase with mouse chitinases and chitinase-like proteins (CLPs). Structure-based amino acid sequence alignment of T. suis chitinase (Ts-Chit) with murine Ym1 (Chil3), Ym2 (Chil4), chitotriosidase isoforms 1 and 2 (Chit1_1, Chit1_2), AMCase (Chia), and BRP-39 (Chil1). Secondary structure elements were predicted and visualized with PSIPRED [1] and SBAL [2], indicating α-helices in green, β-strands in red, and cysteines in yellow. The top line shows the annotation with secondary structure elements observed in the crystal structure of Ts-Chit and the catalytic motive DxDxE [44, 45]. [file 6234836.f1.zip]

Archive with 2 entries (2 files):
- Supplementary Data S2.docx
- Supplementary Table S1.docx
