# Supplementary material for: A Helminth-Derived Chitinase Structurally Similar to Mammalian Chitinase Displays Immunomodulatory Properties in Inflammatory Lung Disease
Source: J Immunol Res. 2021 Nov 25;2021:6234836. doi: 10.1155/2021/6234836 (PMC8639245; doi:10.1155/2021/6234836)
Supplement: Supplementary Materials — Table S1: mass spectrometric identification of T. suis larval ES proteins. Precipitated proteins were reduced, alkylated, tryptic digested, and analyzed by LC-MSMS and Mascot searches against the NCBI database. Significant hits (+) were identified with >2 peptides (p < 0.01); nonsignificant candidates (c) are also listed. Homologous proteins are grouped to the same number. S2: comparison of topology and secondary structure elements of T. suis chitinase with mouse chitinases and chitinase-like proteins (CLPs). Structure-based amino acid sequence alignment of T. suis chitinase (Ts-Chit) with murine Ym1 (Chil3), Ym2 (Chil4), chitotriosidase isoforms 1 and 2 (Chit1_1, Chit1_2), AMCase (Chia), and BRP-39 (Chil1). Secondary structure elements were predicted and visualized with PSIPRED [1] and SBAL [2], indicating α-helices in green, β-strands in red, and cysteines in yellow. The top line shows the annotation with secondary structure elements observed in the crystal structure of Ts-Chit and the catalytic motive DxDxE [44, 45]. [file 6234836.f1.zip › Supplementary Data S2.docx]

**Supporting information to:**

**A helminth-derived chitinase structurally similar to mammalian chitinase displays immunomodulatory properties in inflammatory lung disease.**

Friederike Ebner1*, Katja Lindner1*, Katharina Janek2, Agathe Niewienda2, Piotr H. Malecki3,4, Manfred S. Weiss3, Tara E. Sutherland5, Arnd Heuser6, Anja A. Kühl7, Jürgen Zentek8, Andreas Hofmann9, and Susanne Hartmann1

1Institute of Immunology, Department of Veterinary Medicine, Freie Universität Berlin, Berlin, Germany, *equal contribution

2Charité – Universitätsmedizin Berlin, corporate member of Freie Universität Berlin, Humboldt-Universität zu Berlin, and Berlin Institute of Health, Institute of Biochemistry, Shared Facility for Mass Spectrometry, Berlin, Germany

3Macromolecular crystallography (HZB-MX), Helmholtz-Zentrum Berlin, Berlin, Germany

4current address: International Institute of Molecular and Cell Biology in Warsaw (IIMCB), Poland

5Lydia Becker Institute of Immunologyand Inflammation, Faculty of Biology, Medicine and Health, Manchester Academic Health Science Centre, University of Manchester, Manchester, United Kingdom

6Max Delbrück Center for Molecular Medicine (MDC), Pathophysiology Platform, Berlin, Germany

7Charité *–* Universitätsmedizin Berlin, corporate member of Freie Universität Berlin and Humboldt-Universität zu Berlin, iPATH.Berlin, Berlin, Germany

8Institute of Animal Nutrition, Department of Veterinary Medicine, Freie Universität Berlin, Berlin, Germany

9Department of Veterinary Biosciences, Melbourne Veterinary School, The University of Melbourne, Parkville, Victoria 3010, Australia

**Corresponding author:**

Prof. Dr. Susanne Hartmann

Freie Universität Berlin, Department of Veterinary Medicine, Institute of Immunology

T: +49 30 838-51824, F: +49 30 838-451834

E: [susanne.hartmann@fu-berlin.de](mailto:susanne.hartmann@fu-berlin.de)

**Corresponding author:**

Prof. Dr. Susanne Hartmann

T: +49 30 838-51824, F: +49 30 838-451834

E: susanne.hartmann@fu-berlin.de

**Supplementary Information S2**

**
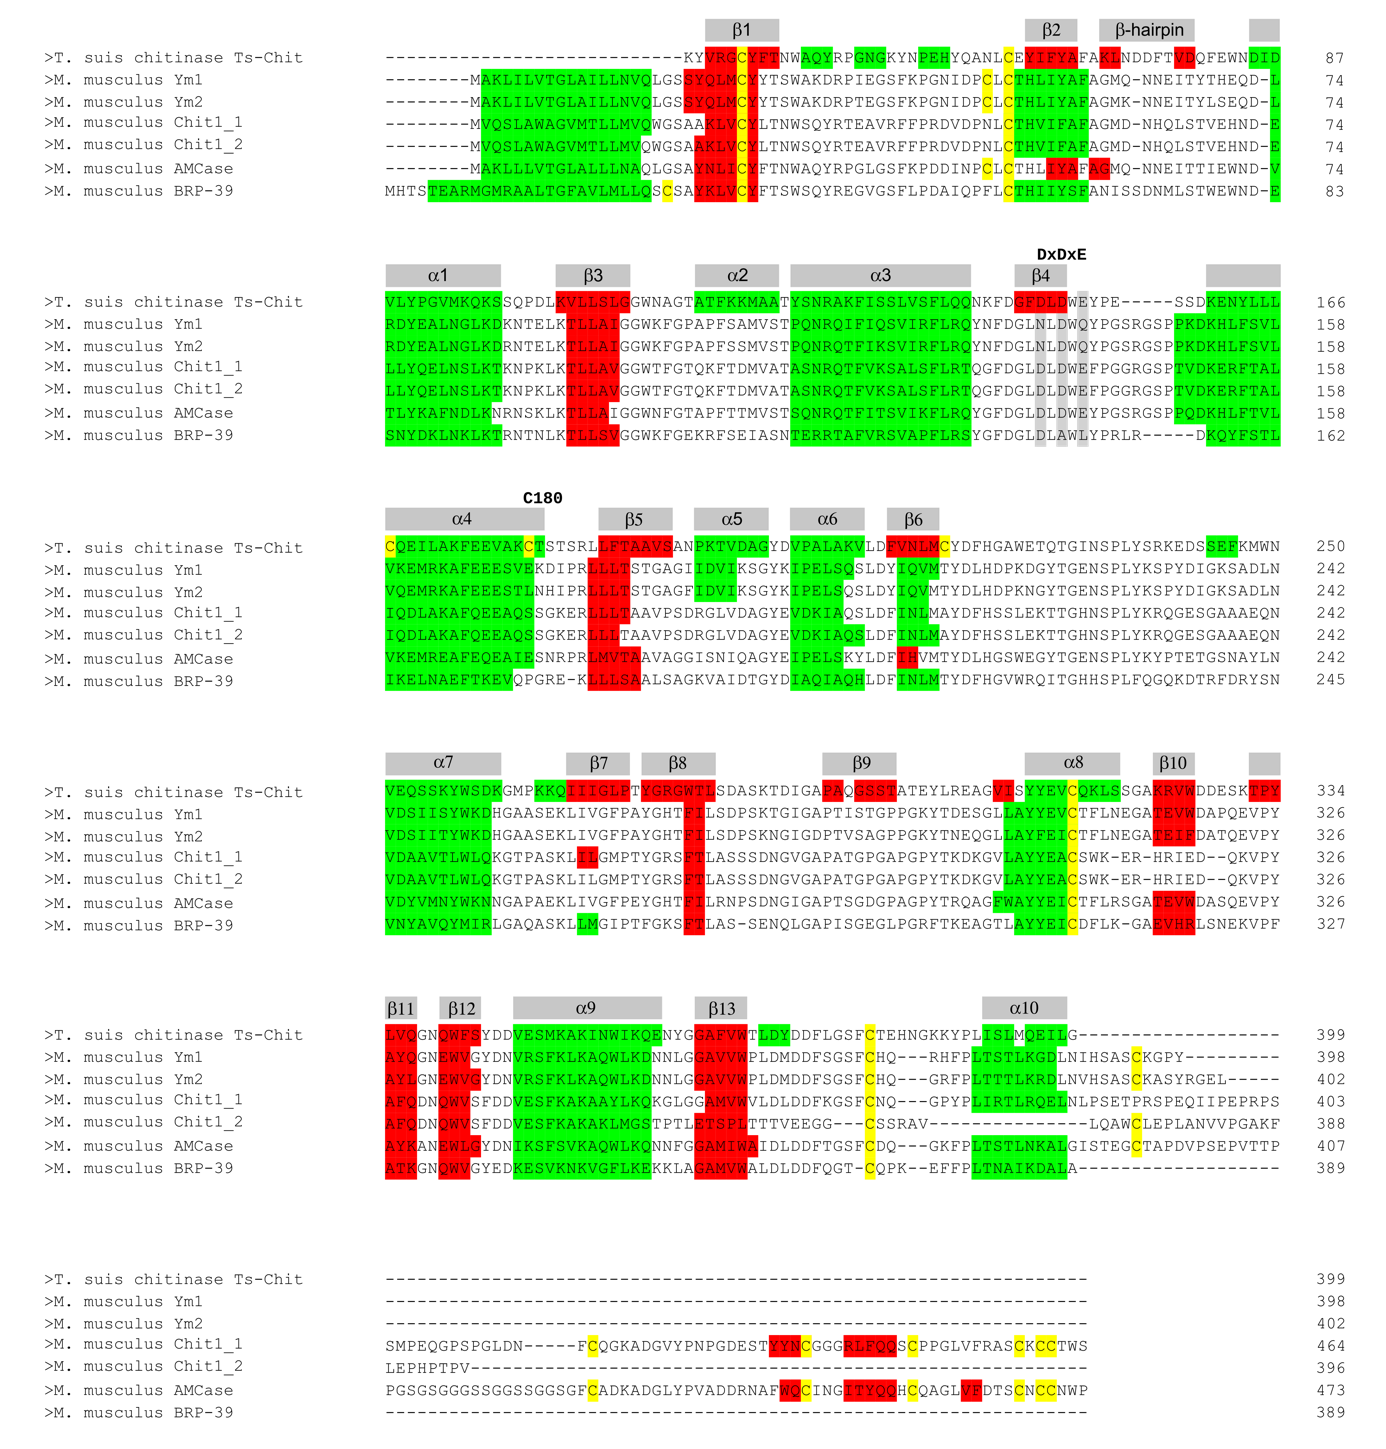
 S2. Comparison of topology and secondary structure elements of *T. suis* chitinase with mouse chitinases and chitinase like proteins (CLPs).** Structure-based amino acid sequence alignment of *T. suis* chitinase (*Ts*-Chit) with murine Ym1 (*Chil3*), Ym2 (*Chil4*), chitotriosidase isoforms 1 & 2 (*Chit1_1, Chit1_2*), AMCase (*Chia*)and BRP-39 (*Chil1*). Secondary structure elements were predicted and visualized with PSIPRED [1] and SBAL [2], indicating -helices in green, -strands in red and cysteines in yellow. The top line shows the annotation with secondary structure elements observed in the crystal structure of *Ts*-Chit and the catalytic motive DxDxE.

**References**

1. Bryson K, McGuffin LJ, Marsden RL, Ward JJ, Sodhi JS, Jones DT. Protein structure prediction servers at University College London. Nucleic Acids Res. 2005;33: W36–W38.

2. Wang CK, Broder U, Weeratunga SK, Gasser RB, Loukas A, Hofmann A. SBAL: a practical tool to generate and edit structure-based amino acid sequence alignments. Bioinformatics. 2012;28: 1026–1027. doi:10.1093/bioinformatics/bts035
